# Supplementary material for: The Gestational Effects of Maternal Bone Marker Molecules on Fetal Growth, Metabolism and Long-Term Metabolic Health: A Systematic Review
Source: MDPI journal article supplement (doi:10.3390/ijms23158328), 2022-07-28
Supplement: s1 [file s1]

| Author                  | Type of study | N    | Ethnicity                   | Trimester                                             | Adjusted for covariates                                                                                                                                   | Maternal Marker Studied | Cutoffs                                                                                     | Outcome                                                                                                                                                                                                                                                                                                                                    | Other outcomes/Comments                                                                                                                                                                                                                                                                                                           |
|-------------------------|---------------|------|-----------------------------|-------------------------------------------------------|-----------------------------------------------------------------------------------------------------------------------------------------------------------|-------------------------|---------------------------------------------------------------------------------------------|--------------------------------------------------------------------------------------------------------------------------------------------------------------------------------------------------------------------------------------------------------------------------------------------------------------------------------------------|-----------------------------------------------------------------------------------------------------------------------------------------------------------------------------------------------------------------------------------------------------------------------------------------------------------------------------------|
| <b>Neelon et al.</b>    | prospective   | 476  | US (multiracial)            | early to mid-pregnancy (no gestational age criterion) | maternal race/ethnicity, age, smoking during pregnancy, education, pre-pregnancy body mass index, infant sex, household income, and season of blood draw. | 25(OH)D                 | Categorized data in quartiles                                                               | Reduced maternal 25(OH)D was associated with lower birth weight for gestational age z-scores (-0.43 units; CI -0.79, -0.07; p=0.02 for Q1 and -0.56 units; CI -0.89, -0.23; p=0.001 for Q2), but higher 1-year weight-for-length (0.78 units; 0.08, 1.54; p=0.04) and 3-year BMI z-scores in offspring (0.83 units; 0.11, 0.93; p=0.02)    |                                                                                                                                                                                                                                                                                                                                   |
| <b>Leffelaar et al.</b> | prospective   | 3730 | The Netherlands Multiethnic | Early pregnancy 12-14 w                               | fetal sex, maternal height, parity, maternal age, smoking, maternal pre-pregnancy BMI, educational level and duration of exclusive breastfeeding          | 25(OH)D                 | Deficient: $\leq 29.9$ nmol/l<br>insufficient: 30–49.9 nmol/l<br>adequate: $\geq 50$ nmol/l | Neonates born to mothers with a deficient Vit D status showed accelerated growth in weight and length during the first year of life                                                                                                                                                                                                        | compared with infants born to mothers with an adequate Vit D status, infants born to mothers in the deficient category had significantly higher weights at months 6 and 9<br>Analyses of length showed that infants in the deficient category were significantly smaller at month 1, but significantly larger at 12 months of age |
| <b>Eckhardt et al.</b>  | Retrospective | 2473 | US multiethnic              | <26 w                                                 | infant age, maternal socioeconomic status, maternal race/ethnicity, season of maternal blood draw, infant feeding mode                                    | 25(OH)D                 | four categories (<30, 30–49, 50–74 and $\geq 75$ nmol/L).                                   | Infants with maternal 25(OH)D $\geq 30$ nmol/L vs <30 nmol/L had z-scores for length and head circumference z-scores 0.13 (95% CI = 0.03–0.23) and 0.20 (95% CI = 0.11–0.28) units higher, respectively, across the first year of life. Similar differences in weight z-scores and BMI z-scores at birth were resolved by 12 months of age |                                                                                                                                                                                                                                                                                                                                   |

|                       |             |                             |       |         |                                                                                                                                                                                                                            |          |                                                                                 |                                                                                                                                                                                                                                     |                                                                                                                                  |
|-----------------------|-------------|-----------------------------|-------|---------|----------------------------------------------------------------------------------------------------------------------------------------------------------------------------------------------------------------------------|----------|---------------------------------------------------------------------------------|-------------------------------------------------------------------------------------------------------------------------------------------------------------------------------------------------------------------------------------|----------------------------------------------------------------------------------------------------------------------------------|
|                       |             |                             |       |         | and study site, infant sex and maternal pre-pregnancy BMI                                                                                                                                                                  |          |                                                                                 |                                                                                                                                                                                                                                     |                                                                                                                                  |
| <b>Jiang et al.</b>   | Prospective | 329                         | China | 11-29 w | maternal age, gestational weight gain, maternal Vit D and folic acid supplementation, season of serum sampling, fetal sex, complications of pregnancy, SGA, LBW, breastfeeding duration and 1-year-old infant Vit D levels | 25(OH)D  | Deficiency: <30 nmol/L<br>insufficiency 30-50 nmol/L<br>sufficiency ≥50 nmol/L] | no significant relationships were found between maternal Vit D concentrations and anthropometric indices: weight (p=0.788), length (p=0.843) and BMI (p=0.778) during 0 to 3 years old                                              | maternal vitamin D status appeared to be unrelated with offspring BMI-Z trajectories in multivariable logistic regression models |
| <b>Morales et al.</b> | prospective | 1498 1 year<br>1344 4 years | Spain | 13-15 w | area of study, child's sex, age at assessment, maternal social class and education, maternal pre-pregnancy BMI, gestational weight gain, maternal smoking in pregnancy and parity                                          | 25(OH)D3 | Deficit <20 ng/mL<br>insufficiency 20–29.9 ng/ml<br>reference group ≥30 ng/ml   | 25(OH)D3 deficit was associated with an increased risk of overweight in offspring at age 1 year (OR=1.42, 95% CI: 1.02–1.97; P=0.039); however, the association was attenuated at age 4 years (OR=1.19, 95% CI: 0.83–1.72; P=0.341) |                                                                                                                                  |
| <b>Crozier et al.</b> | prospective | 977                         | UK    | 34 w    | sex, age at measurement, and childhood height, educational attainment, smoking in pregnancy, pre-                                                                                                                          | 25(OH)D  | Low Vit D status: <50 nmol/L<br>50 to 75 nmol/L<br>>75 nmol/L                   | Lower maternal Vit D status was associated with lower neonatal fat mass at birth, but with greater fat mass at 4 and 6 years of age                                                                                                 |                                                                                                                                  |

|                           |                          |     |           |                  |                                                                                                                                                                                           |         |                                                                                    |                                                                                                                                                                                                                                                                                                                                                                                                                                                                                                                                                                                                               |
|---------------------------|--------------------------|-----|-----------|------------------|-------------------------------------------------------------------------------------------------------------------------------------------------------------------------------------------|---------|------------------------------------------------------------------------------------|---------------------------------------------------------------------------------------------------------------------------------------------------------------------------------------------------------------------------------------------------------------------------------------------------------------------------------------------------------------------------------------------------------------------------------------------------------------------------------------------------------------------------------------------------------------------------------------------------------------|
|                           |                          |     |           |                  | pregnancy BMI, height, parity, social class, and IOM weight gain, category, breastfeeding duration, Vit D intake at age 3 y, and physical activity at age 3 y                             |         |                                                                                    |                                                                                                                                                                                                                                                                                                                                                                                                                                                                                                                                                                                                               |
| <i>Hyde et al.</i>        | Prospective cohort study | 402 | Australia | <16 w<br>28-32 w | Season of sample collection, child height, sex, maternal parity and smoking status at recruitment                                                                                         | 25(OH)D | -                                                                                  | Maternal Vit D status in early pregnancy, in smokers, was negatively associated with offspring fat mass percentage and positively associated with lean mass (both p < 0.05). at 11-year follow up                                                                                                                                                                                                                                                                                                                                                                                                             |
| <i>Krishnaveni et al.</i> | retrospective            | 568 | India     | 28-32 w          | Maternal age, neonatal sex, parity, religion, gestational diabetes status, socioeconomic score, season of assessment of offspring characteristics (as a proxy for their vitamin D status) | 25(OH)D | deficiency <50nmol<br><br>different cutoffs <20, <30, <40, <50, <60, and <70nmol/L | At ages 5 and 9.5 years, children born to Vit D deficient mothers had smaller arm-muscle area in comparison with children born to mothers without deficiency (P<0.05). There was no difference in grip strength between offspring of women with and without vitamin D deficiency. At 9.5 years, children of Vit D deficient mothers had higher fasting insulin resistance than children of nondeficient women (P=0.04)<br><br>Intrauterine exposure to low 25(OH)D concentrations is associated with less muscle mass and higher insulin resistance in children<br><br>Included 35 gestational diabetes cases |

|                      |                    |                                                                                |           |                |                                                                                                                  |         |                                                                                   |                                                                                                                                                                                                                                                                                                                                    |                                                                                                                                                                                                                                                                                                                                                                                                                                                                                                                           |
|----------------------|--------------------|--------------------------------------------------------------------------------|-----------|----------------|------------------------------------------------------------------------------------------------------------------|---------|-----------------------------------------------------------------------------------|------------------------------------------------------------------------------------------------------------------------------------------------------------------------------------------------------------------------------------------------------------------------------------------------------------------------------------|---------------------------------------------------------------------------------------------------------------------------------------------------------------------------------------------------------------------------------------------------------------------------------------------------------------------------------------------------------------------------------------------------------------------------------------------------------------------------------------------------------------------------|
| <b>Javaid et al.</b> | longitudinal study | 160                                                                            | UK        | Late pregnancy | Offspring age, childhood height, socioeconomic status, supplementation status, gestational and chronological age | 25(OH)D | Vit D replete >20 µg/L, Insufficient 11–20 µg/L Deficient <11 µg/L                | <p>Reduced concentration of maternal 25(OH)D during late pregnancy was associated with reduced whole-body (r=0.21, p=0.0088) and lumbar-spine (r=0.17, p=0.03) bone-mineral content in children at age 9 years</p> <p>Reduced concentration of umbilical-venous calcium also predicted reduced childhood bone mass (p=0.0286).</p> | <p>Maternal Vit D status during late pregnancy was not associated with birthweight (p=0.24), birth length (p=0.07), placental weight (p=0.43), abdominal circumference (p=0.10), or head circumference (p=0.51).</p> <p>Maternal Vit D insufficiency is associated with reduced bone mineral accrual in the offspring during childhood</p> <p>Vit D supplementation of pregnant women, especially during winter months, could lead to long-lasting reductions in the risk of osteoporotic fracture in their offspring</p> |
| <b>Gale et al.</b>   | Prospective        | 466<br>440 followed up at the age of 9 months<br><br>178 at the age of 9 years | UK        | Late pregnancy | -                                                                                                                | 25(OH)D | Vit D replete: >50 nmol/l, Insufficiency: 27.5-50 nmol/l Deficiency: <27.5 nmol/l | no associations reported between maternal 25(OH)D concentrations and the child's body size or measures of the child's intelligence, psychological health or cardiovascular system at birth, 9 months and 9 years of age                                                                                                            |                                                                                                                                                                                                                                                                                                                                                                                                                                                                                                                           |
| <b>Ong et al.</b>    | Prospective        | 910                                                                            | Singapore | 26-28 w        | maternal ethnicity, education, smoking during pregnancy, age,                                                    | 25(OH)D | Deficiency <50nmol/l insufficiency 50–75nmol/l                                    | no statistically significant associations between maternal Vit D status and any                                                                                                                                                                                                                                                    | low prevalence (1.6 % of the cohort) of severe maternal Vit D deficiency in study population                                                                                                                                                                                                                                                                                                                                                                                                                              |

|                      |                          |                                                                                                              |         |      |                                                                                                                                    |         |                              |                                                                                                                                                                                                                                                                                                                                                                                                |                                                                                                                                                                                                                                                                                                                            |
|----------------------|--------------------------|--------------------------------------------------------------------------------------------------------------|---------|------|------------------------------------------------------------------------------------------------------------------------------------|---------|------------------------------|------------------------------------------------------------------------------------------------------------------------------------------------------------------------------------------------------------------------------------------------------------------------------------------------------------------------------------------------------------------------------------------------|----------------------------------------------------------------------------------------------------------------------------------------------------------------------------------------------------------------------------------------------------------------------------------------------------------------------------|
|                      |                          |                                                                                                              |         |      | pregnancy BMI, total maternal energy intake, infant birth order and infant sex                                                     |         | sufficiency $\geq 75$ nmol/l | of the birth outcomes: – small for gestational age (OR 1.00; 95% CI 0.56, 1.79) and pre-term birth (OR 1.16; 95% CI 0.64, 2.11) – growth outcomes – weight-for-age z-scores, length-for-age z-scores, circumferences of the head, abdomen and mid-arm at birth or postnatally – and adiposity outcomes – BMI, and skinfold thickness (triceps, biceps and subscapular) at birth or postnatally |                                                                                                                                                                                                                                                                                                                            |
| <b>Rytter et al.</b> | Prospective cohort study | 850<br><br>629 (74%) self-reported anthropometrics<br><br>410 (48%) participated in the clinical examination | Denmark | 30 w | Maternal pre-pregnancy BMI, maternal education, smoking during pregnancy, maternal age, parity, season of blood collection and sex | 25(OH)D | In quartiles                 | <p>No association was observed between maternal 25(OH)D in week 30 of gestation and offspring cardio-metabolic risk factors</p> <p>However, the analyses did suggest a possible inverse association with blood pressure in females</p>                                                                                                                                                         | <p>Maternal 25(OH)D concentration was not associated with BMI, waist circumference or the adipose tissue derived hormones leptin and adiponectin in the 20-year-old offspring independent of sex</p> <p>Also, no association was found with glucose metabolism measured by fasting glucose, insulin, HOMA-IR and HbA1c</p> |

|                                       |               |                                                                       |        |                       |                                                                                                                                                                                 |         |                                                                                                          |                                                                                                                                                                                                                                                                                                         |                                                                                                                                                                                                                             |
|---------------------------------------|---------------|-----------------------------------------------------------------------|--------|-----------------------|---------------------------------------------------------------------------------------------------------------------------------------------------------------------------------|---------|----------------------------------------------------------------------------------------------------------|---------------------------------------------------------------------------------------------------------------------------------------------------------------------------------------------------------------------------------------------------------------------------------------------------------|-----------------------------------------------------------------------------------------------------------------------------------------------------------------------------------------------------------------------------|
|                                       |               |                                                                       |        |                       |                                                                                                                                                                                 |         |                                                                                                          |                                                                                                                                                                                                                                                                                                         | Regarding lipid metabolism, no association was found with total and LDL cholesterol, triglyceride, and apolipoprotein B<br><br>However, a weak inverse association between 25(OH)D and HDL cholesterol was found in females |
| <b>Sørensen et al.</b>                | retrospective | 109                                                                   | Norway | Late pregnancy        | Sex, season of blood draw, maternal age, parity, gestational age, and region of residence                                                                                       | 25(OH)D | Quartile 1: ≤54 nmol/L<br>Quartile 2: 54-69 nmol/L<br>Quartile 3: 69-89 nmol/L<br>Quartile 4: >89 nmol/L | there was a trend toward a higher risk of type 1 diabetes with lower levels of Vit D during pregnancy. The odds of type 1 diabetes were more than twofold higher for the offspring of women with the lowest levels of 25(OH)D compared with the offspring of those with levels above the upper quartile |                                                                                                                                                                                                                             |
| <b>Brekke &amp; Ludvigsson et al.</b> | retrospective | 16070<br><br>11081 at 1 year follow-up<br>8805 at 2.5 years follow-up | Sweden | -                     | familial type 1 diabetes, maternal education, maternal age, delivery mode, weight increase from birth, breast-feeding duration, introduction of cow's-milk protein, fish intake | -       | -                                                                                                        | Use of Vit D -containing supplements during pregnancy was associated with reduced diabetes-related autoimmunity at 1 year of age (adjusted odds ratio: 0.707, 95%CI: 0.520–0.962, p=0.028) but not at 2.5 years                                                                                         |                                                                                                                                                                                                                             |
| <b>Fronczak et al.</b>                | retrospective | 233                                                                   | US     | 3 <sup>rd</sup> trim. | HLA genotype, family history of type 1 diabetes, presence of gestational diabetes mellitus, and ethnicity                                                                       | -       | -                                                                                                        | Maternal intake of vitamin D via food was significantly associated with a decreased risk of IA appearance in offspring (adjusted                                                                                                                                                                        | Maternal intake of Vit D through food during pregnancy may have a protective effect on the appearance of islet autoimmunity in offspring                                                                                    |

|                          |                                            |                                                      |         |                   |                                                                                                                                                                                                |                        |                                                                                                              |                                                                                                                                                                                                                                                                                                                                                                                                                                                           |                                                                                                                                                                                                                                                             |
|--------------------------|--------------------------------------------|------------------------------------------------------|---------|-------------------|------------------------------------------------------------------------------------------------------------------------------------------------------------------------------------------------|------------------------|--------------------------------------------------------------------------------------------------------------|-----------------------------------------------------------------------------------------------------------------------------------------------------------------------------------------------------------------------------------------------------------------------------------------------------------------------------------------------------------------------------------------------------------------------------------------------------------|-------------------------------------------------------------------------------------------------------------------------------------------------------------------------------------------------------------------------------------------------------------|
|                          |                                            |                                                      |         |                   |                                                                                                                                                                                                |                        |                                                                                                              | HR=0.37; 95% CI 0.17-0.78)                                                                                                                                                                                                                                                                                                                                                                                                                                |                                                                                                                                                                                                                                                             |
| <b>Marjamäki et al.</b>  | prospective, population-based birth cohort | 3,723                                                | Finland | -                 | familial diabetes, genetic risk group, sex, gestational age, maternal age, maternal education, delivery hospital, route of delivery, number of earlier deliveries and smoking during pregnancy | Vitamin D daily intake | -                                                                                                            | The maternal intake of Vit D, either from food or from supplements, was not associated with the risk of advanced beta cell autoimmunity/type 1 diabetes in offspring (HR [95% CI] for intake of Vit D from food 1.25 [0.80–1.95], for vitamin D intake from supplements 1.05 [0.95–1.16]), or with the risk of type 1 diabetes alone (HR [95% CI] for intake of vitamin D from food 0.84 [0.41–1.72], for Vit D intake from supplements 1.09 [0.99–1.20]) |                                                                                                                                                                                                                                                             |
| <b>Miettinen et al.</b>  | retrospective                              | 343                                                  | Finland | Early gestation   | -                                                                                                                                                                                              | 25(OH)D                | deficiency <25 nmol/l<br>insufficiency 25–50 nmol/l<br>sufficiency 50–75 nmol/l<br>optimal levels >75 nmol/l | No difference was found in serum 25(OH)D concentrations during first trimester of pregnancy between mothers whose children later on developed type 1 diabetes, and mothers of non-diabetic, healthy children of the same age (p=0.88)                                                                                                                                                                                                                     |                                                                                                                                                                                                                                                             |
| <b>Santamaria et al.</b> | Systematic review & metanalysis            | 30 studies<br><br>2 studies for outcomes after birth | -       | -                 | -                                                                                                                                                                                              | 25(OH)D                | -                                                                                                            | Low prenatal Vit D levels were associated with lower birth weight (MD -100.69; 95%CI -162.25, -39.13), increased risk of small-for-gestational-age (OR 1.55; 95%CI 1.16, 2.07) and an elevated weight in infant at the age of 9 months (MD 119.75; 95%CI 32.97, 206.52)                                                                                                                                                                                   | No associations were observed between prenatal vitamin D status and other growth parameters at birth, age 1 year, 4-6 years or 9 years, nor with diabetes type 1<br><br>Prenatal Vit D may play a role in infant adiposity and accelerated postnatal growth |
| <b>Hornsby et al.</b>    | Randomized control trial                   | Arm 1: 26 newborns with maternal Vit D3              | -       | 2nd and 3rd trim. | -                                                                                                                                                                                              | 25(OH)D                | insufficiency <30 ng/mL                                                                                      | Arm 1 in comparison to arm 2, resulted in an enhanced broad-spectrum proinflammatory cytokine response of cord blood                                                                                                                                                                                                                                                                                                                                      |                                                                                                                                                                                                                                                             |

|                     |                                          |                                                                                                         |           |                |                                                                                                                                                                                         |         |                                                                                                      |                                                                                                                                                                                                                                                                                                                                                                                                                        |                                                                                                                                               |
|---------------------|------------------------------------------|---------------------------------------------------------------------------------------------------------|-----------|----------------|-----------------------------------------------------------------------------------------------------------------------------------------------------------------------------------------|---------|------------------------------------------------------------------------------------------------------|------------------------------------------------------------------------------------------------------------------------------------------------------------------------------------------------------------------------------------------------------------------------------------------------------------------------------------------------------------------------------------------------------------------------|-----------------------------------------------------------------------------------------------------------------------------------------------|
|                     |                                          | supplementation of 4400 IU/d<br><br>Arm 2: 25 newborns with maternal Vit D3 supplementation of 400 IU/d |           |                |                                                                                                                                                                                         |         |                                                                                                      | mononuclear cells to innate and mitogenic stimuli (P=.0009), with an average 1.7- to 2.1-fold increase in levels of proinflammatory cytokines (GM-CSF, IFN- $\gamma$ , IL-1 $\beta$ , IL-6, and IL-8) across stimuli, a higher gene expression level of TLR2 (P=.02) and TLR9 (P=.02), a greater than 4-fold increase in IL-17A (P=.03) production after polyclonal T-cell stimulation, and an enhanced IL-10 response |                                                                                                                                               |
| <b>Zosky et al.</b> | Retrospective, longitudinal birth cohort | 24 children 6 years old<br>25 children 14 years old                                                     | Australia | 16 – 20 weeks  | Maternal history of asthma, parental education, maternal age, birth order, breastfed for at least first 12 months, maternal smoking/alcohol use, pubertal status, current asthma/wheeze | 25(OH)D | Deficiency <50 nmol/L<br>Insufficiency 50-75 nmol/L<br>Sufficiency >75 nmol/L                        | No associations between maternal Vit D status and atopic status in offspring<br><br>Maternal 25(OH)D deficiency was associated with wheeze and asthma (evident only in boys) at the age of 6 years.<br><br>No similar associations in 14-year-olds                                                                                                                                                                     | Maternal Vit D status during fetal lung developmental period may impact postnatal lung growth and increase the risk for onset of lung disease |
| <b>Gale et al.</b>  | prospective                              | 440 at 9 months of age                                                                                  | UK        | Late pregnancy | Maternal education, season of birth                                                                                                                                                     | 25(OH)D | Quarter 1: <30 nmol/L<br>Quarter 2: 30-50 nmol/L<br>Quarter 3: 50-75 nmol/L<br>Quarter 4: >75 nmol/L | Children of mothers with 25(OH)D levels exceeding 75 nmol/L during pregnancy had increased risk of atopic disorders and eczema (OR 3.26, 95% CI 1.15-9.29, P=0.025)                                                                                                                                                                                                                                                    | After adjusting data for season of birth, the correlation attenuated (OR 2.50, 95% CI 0.80-7.77)                                              |
| <b>Pike et al.</b>  | prospective                              | 860                                                                                                     | UK        | 34 weeks       | Adjusted to maternal, paternal and                                                                                                                                                      | 25(OH)D | -                                                                                                    | No significant associations between maternal late-pregnancy Vit D status and either asthma or wheeze at age 6 years.                                                                                                                                                                                                                                                                                                   |                                                                                                                                               |



|                       |                               |                                                                                                                                     |       |                |                                                                                                                                                                                                                                                                                                               |         |                                                                                                               |                                                                                                                                                                                                                                                                                                                                                                                                                                          |                                                                                                                                                                                                                                      |
|-----------------------|-------------------------------|-------------------------------------------------------------------------------------------------------------------------------------|-------|----------------|---------------------------------------------------------------------------------------------------------------------------------------------------------------------------------------------------------------------------------------------------------------------------------------------------------------|---------|---------------------------------------------------------------------------------------------------------------|------------------------------------------------------------------------------------------------------------------------------------------------------------------------------------------------------------------------------------------------------------------------------------------------------------------------------------------------------------------------------------------------------------------------------------------|--------------------------------------------------------------------------------------------------------------------------------------------------------------------------------------------------------------------------------------|
|                       |                               |                                                                                                                                     |       |                | child characteristics                                                                                                                                                                                                                                                                                         |         |                                                                                                               | <p>Maternal vitamin D status was not associated with transient or persistent/late wheeze</p> <p>No significant association between persistent/late wheeze according to atopic status</p> <p>No associations were found with skin sensitisation or lung function</p> <p>No evidence that exposure to higher concentrations of 25(OH)D in maternal serum during late pregnancy increases the risk of childhood asthma, wheeze or atopy</p> |                                                                                                                                                                                                                                      |
| <i>Morales et al.</i> | population-based birth cohort | <p>1st year: 1724 children (wheezing)<br/>1693 (lower respiratory tract infection)</p> <p>4-6 years: 1233 (wheezing and asthma)</p> | Spain | Late 1st trim. | <p>infant sex, siblings at birth, season at birth, maternal age, maternal ethnicity, maternal education level, maternal social class, maternal smoking during pregnancy, breastfeeding duration, maternal history of asthma, pre-pregnancy maternal BMI and day care attendance in the first year of life</p> | 25(OH)D | <p>Quartile 1: &lt;21.9 ng/mL</p> <p>Q2: 21.9-29.1 ng/mL</p> <p>Q3: 29.2-37 ng/mL</p> <p>Q4: &gt;37 ng/mL</p> | <p>A trend for an independent association between higher levels of maternal 25(OH)D levels in pregnancy was noted</p> <p>Decreased odds of lower respiratory tract infections in offspring (for cohort- and season-specific quartile Q4 vs. Q1, OR=0.67, 95% CI 0.50, 0.90, test for trend, P=0.016)</p> <p>No association between 25(OH)D levels and risk of wheezing at age 1 year or 4 years, or asthma at age 4-6 years</p>          | <p>higher maternal 25(OH)D levels were independently associated with lower risk of respiratory tract infections in their children during the first year of life, but no connections were noted with childhood asthma or wheezing</p> |

|                        |                               |                                                      |         |                |                                                                                                                                                                                                                                                                                            |                      |                                                   |                                                                                                                                                                        |
|------------------------|-------------------------------|------------------------------------------------------|---------|----------------|--------------------------------------------------------------------------------------------------------------------------------------------------------------------------------------------------------------------------------------------------------------------------------------------|----------------------|---------------------------------------------------|------------------------------------------------------------------------------------------------------------------------------------------------------------------------|
| <b>Dullaert et al.</b> | Prospective cohort            | 240<br><br>37 infants available for 1 year follow-up | Belgium | After delivery | Parity, maternal age, fetal sex, gestational diabetes, maternal glucose level, preeclampsia, birthweight, breastfeeding, sibling to daycare                                                                                                                                                | 25(OH)D              | Deficiency ≤20 ng/mL<br>Insufficiency 21-29 ng/mL | In multivariate analysis, no correlation of maternal Vit D at delivery with respiratory tract infections nor atopic dermatitis in the first year of life               |
| <b>Erkkola et al.</b>  | population-based birth cohort | 1669 children at 5 years of age                      | Finland | -              | sex, area of birth, duration of gestation, maternal age, maternal basic education, maternal smoking during pregnancy, number of siblings, parental asthma, parental allergic rhinitis, child's atopic eczema before the age of 6 months and pets inside the house before the age of 1 year | Vit D dietary intake | -                                                 | Maternal dietary intake of Vit D was negatively related to risk of asthma [hazard ratio (HR) 0.80, 95% CI 0.64-0.99] and allergic rhinitis [HR 0.85; 95% CI 0.75-0.97] |

Table S5: Studies on the effects of maternal bone turnover markers during gestation on future metabolic and endocrine wellbeing, as well as on and immunological status of offspring.
