# Supplementary material for: The Gestational Effects of Maternal Bone Marker Molecules on Fetal Growth, Metabolism and Long-Term Metabolic Health: A Systematic Review
Source: MDPI journal article supplement (doi:10.3390/ijms23158328), 2022-07-28
Supplement: s1 [file s1]

| Author                  | Type of study | N    | Ethnicity                     | Trimester                | Adjusted for covariates                                                                                                                                                                                                                                | Maternal Marker Studied              | Cutoff used                                                                             | Outcome                                                                                                                                                                                                                                                                                              | Other outcomes/Comments                                                                                                                                                                                          |
|-------------------------|---------------|------|-------------------------------|--------------------------|--------------------------------------------------------------------------------------------------------------------------------------------------------------------------------------------------------------------------------------------------------|--------------------------------------|-----------------------------------------------------------------------------------------|------------------------------------------------------------------------------------------------------------------------------------------------------------------------------------------------------------------------------------------------------------------------------------------------------|------------------------------------------------------------------------------------------------------------------------------------------------------------------------------------------------------------------|
| <b>Early gestation</b>  |               |      |                               |                          |                                                                                                                                                                                                                                                        |                                      |                                                                                         |                                                                                                                                                                                                                                                                                                      |                                                                                                                                                                                                                  |
| <b>Wang H.</b>          | prospective   | 747  | China                         | 1st prenatal visit       | maternal age, maternal race, pre-pregnancy BMI, height, smoking, planned pregnancy, marital status, education, family's socio-professional category, delivery, season, Vit D supplementation, physical activity, Vit D lifestyle score, and infant sex | 25(OH)D                              | Deficiency $\leq 20$ ng/ml)<br>insufficiency 20–29 ng/ml<br>sufficiency $\geq 30$ ng/ml | Reported a nonlinear relation between 25(OH)D, birth weight and head circumference ( $P < 0.01$ ). Birth weight and head circumference increased by 69 (95% CI: 38–122) g and 0.31 (0.22–0.40) cm, respectively, per 1 ng/ml increase in maternal 25(OH)D, up to 20 ng/ml and leveled off thereafter | For each 1 unit decrease of maternal 25(OH)D, the unadjusted and adjusted risk of SGA increased by 19% (odds ratio 1.19 [95% CI 1.13–1.25], $P < 0.001$ ) and 9% (1.08 [1.03–1.16], $P = 0.009$ ), respectively. |
| <b>Fernando et al.</b>  | retrospective | 304  | Australia                     | Early pregnancy <20w     | maternal covariates including age, body mass index (BMI) and ethnicity                                                                                                                                                                                 | Total, free and bioavailable 25(OH)D | -                                                                                       | Higher maternal total and free 25(OH)D concentrations were associated with higher neonatal birthweight ( $\beta = 5.05$ , $p = 0.002$ and $\beta = 18.06$ , $p = 0.02$ , respectively                                                                                                                |                                                                                                                                                                                                                  |
| <b>Hyde et al.</b>      | prospective   | 402  | Australia                     | At booking <16 and 28-32 | Maternal smoking status                                                                                                                                                                                                                                | 25(OH)D                              | -                                                                                       | In smokers, but not non-smokers, serum 25(OH)D status at recruitment was inversely associated with newborn's fat mass percentage but positively associated with lean mass (both $p < 0.05$ )                                                                                                         | No association at 28–32 weeks of gestation                                                                                                                                                                       |
| <b>Leffelaar et al.</b> | prospective   | 3730 | The Netherlands (multiethnic) | 12-14w                   | fetal sex, maternal height, parity, maternal age, smoking, maternal pre-pregnancy                                                                                                                                                                      | 25(OH)D                              | Deficient $\leq 29.9$ nmol/l, insufficient 30–49.9 nmol/l                               | compared with women with adequate Vit D levels, women with deficient Vit D levels                                                                                                                                                                                                                    | Neonates born to mothers with a deficient Vit D status showed accelerated growth in weight and length during the first year of life                                                                              |

|                            |                                     |       |                  |                                                 |                                                                                                                                                                                                           |          |                                                                                |                                                                                                                                                                                                                                                                                                                                                                                                                                                                                                                                                                                                                                                                   |                                                                                                                                                |
|----------------------------|-------------------------------------|-------|------------------|-------------------------------------------------|-----------------------------------------------------------------------------------------------------------------------------------------------------------------------------------------------------------|----------|--------------------------------------------------------------------------------|-------------------------------------------------------------------------------------------------------------------------------------------------------------------------------------------------------------------------------------------------------------------------------------------------------------------------------------------------------------------------------------------------------------------------------------------------------------------------------------------------------------------------------------------------------------------------------------------------------------------------------------------------------------------|------------------------------------------------------------------------------------------------------------------------------------------------|
|                            |                                     |       |                  |                                                 | BMI and educational level                                                                                                                                                                                 |          | and adequate'≥50 nmol/l                                                        | had infants with lower birth weights (2114.4 g, 95 % CI 2 151.2, 2 77.6) and a higher risk of SGA (OR 2.4, 95 % CI 1.9, 3.2)                                                                                                                                                                                                                                                                                                                                                                                                                                                                                                                                      |                                                                                                                                                |
| <b>van den Berg et al.</b> | population-based birth cohort study | 2,274 | Netherlands      | Early pregnancy                                 | Maternal overweight, season of blood sampling, and maternal smoking                                                                                                                                       | 25(OH)D  | -                                                                              | women in the lowest 25(OH)D quartile had a higher risk of an SGA offspring (OR 1.57, 95% CI 1.03–2.39)<br><br>25(OH)D appears to be a modifiable contributor to the association between low maternal education and SGA offspring, particularly in overweight women and women who conceived in the winter period                                                                                                                                                                                                                                                                                                                                                   |                                                                                                                                                |
| <b>Gernand et al.</b>      | retrospective                       | 2146  | USA multicentric | At booking and every 8 weeks after and up to 26 | season of blood sampling, gestational age, pre-pregnancy body mass index, height, parity, smoking, marital status, socioeconomic status, maternal age, study site (accounts for latitude), and infant sex | 25(OH)D  | -                                                                              | mothers with 25(OH)D of 37.5 nmol/liter or greater gave birth to newborns with 46 g [95% confidence interval (CI), 9–82 g] higher birth weights and 0.13 cm (0.01–0.25 cm) larger head circumferences compared with mothers with less than 37.5 nmol/liter<br><br>No association was observed between 25(OH)D and ponderal index, placental weight, or the placental to fetal weight ratio<br><br>Maternal 25(OH)D of 37.5 nmol/liter or greater vs. less than 37.5 nmol/liter in the first trimester was associated with half the risk of small for gestational age (adjusted odds ratio 0.5; 95% CI 0.3– 0.9), but no second-trimester association was observed |                                                                                                                                                |
| <b>Rodriguez et al.</b>    | Prospective cohort                  | 2382  | Spain            | 11-15 w                                         | child's sex, gestational age, month at blood sampling, parity, maternal age, ethnic background, maternal social class and education level, maternal pre-pregnancy body mass index,                        | 25(OH)D3 | Insufficiency: 20–29.99 ng/ml] deficiency: <20 ng/ml], sufficiency: ≥30 ng/ml] | Offspring of mothers with higher circulating 25(OH)D3 concentration tended to have smaller HC [coefficient (SE) per doubling concentration of 25(OH)D3, 0.10 (0.05), P = 0.038].                                                                                                                                                                                                                                                                                                                                                                                                                                                                                  | No evidence reported of an association between Vit D status in pregnancy and GDM, preterm delivery, FGR, SGA and anthropometric birth outcomes |

|                        |                                        |      |                       |                                           |                                                                                                                                                                                                        |         |                                                                               |                                                                                                                                                          |                                                                                                                           |
|------------------------|----------------------------------------|------|-----------------------|-------------------------------------------|--------------------------------------------------------------------------------------------------------------------------------------------------------------------------------------------------------|---------|-------------------------------------------------------------------------------|----------------------------------------------------------------------------------------------------------------------------------------------------------|---------------------------------------------------------------------------------------------------------------------------|
|                        |                                        |      |                       |                                           | maternal smoking and alcohol consumption during pregnancy, and maternal energy intake during pregnancy                                                                                                 |         |                                                                               |                                                                                                                                                          |                                                                                                                           |
| <b>Schneuer et al.</b> | prospective, nested case-control study | 5109 | Australia multiethnic | 1 <sup>st</sup> trim. (10-14 w)           | maternal age, parity, smoking during pregnancy, maternal weight, previously diagnosed hypertension, previously diagnosed diabetes, season at sampling, country of birth, or socioeconomic disadvantage | 25(OH)D | -                                                                             | Low 25(OH)D serum concentrations in the first trimester of pregnancy are not associated with adverse pregnancy outcomes and do not predict complications |                                                                                                                           |
| <b>Aji et al.</b>      | prospective cohort                     | 232  | Indonesia             | 1 <sup>st</sup> and 3 <sup>rd</sup> trim. | maternal age, pre-pregnancy BMI and gestational age at delivery                                                                                                                                        | 25(OH)D | Deficiency: <12 ng/mL<br>Insufficiency: 12-19 ng/mL<br>Sufficiency ≥ 20 ng/mL | Not associated with neonatal anthropometry at birth (p>0.05) (LBW, birth length, low HC)                                                                 |                                                                                                                           |
| <b>Yuniati et al.</b>  | prospective cohort                     | 203  | Indonesia             | 1 <sup>st</sup> trim.                     | maternal age, pre-pregnancy body mass index, and parity                                                                                                                                                | 25(OH)D | deficient <20 ng/mL, insufficient 20-29.99 ng/mL and normal ≥30 ng/mL         | No significant association reported between maternal serum Vit D and neonatal birth weight, before and after adjustment for confounders                  |                                                                                                                           |
| <b>Park et al.</b>     | prospective                            | 523  | Korea                 | 1 <sup>st</sup> trim.                     | maternal age, pre-pregnancy body mass index, BMI at booking, BMI at GDM screening, gestational age at sampling, previous GDM, Vit D intake                                                             | 25(OH)D | Sufficient ≥ 50 nmol/L, borderline 25-49.9 nmol/L, insufficient <25 nmol/L    | birth weight was independent of maternal serum 25-OH-D levels during the first, second and third trimester of pregnancy.                                 | neither GDM prevalence nor fetal growth during pregnancy is associated with Vit D deficiency at 1st trim. in Korean women |

|                           |                            |       |                  |         |                                                                                                                                                                                                                                                                                      |         |                                                                                                                             |                                                                                                                                                                                                      |                                                                                                                                                                                                                                                                                                                                                                  |
|---------------------------|----------------------------|-------|------------------|---------|--------------------------------------------------------------------------------------------------------------------------------------------------------------------------------------------------------------------------------------------------------------------------------------|---------|-----------------------------------------------------------------------------------------------------------------------------|------------------------------------------------------------------------------------------------------------------------------------------------------------------------------------------------------|------------------------------------------------------------------------------------------------------------------------------------------------------------------------------------------------------------------------------------------------------------------------------------------------------------------------------------------------------------------|
|                           |                            |       |                  |         | and season of sampling                                                                                                                                                                                                                                                               |         |                                                                                                                             |                                                                                                                                                                                                      |                                                                                                                                                                                                                                                                                                                                                                  |
| 2 <sup>nd</sup> trimester |                            |       |                  |         |                                                                                                                                                                                                                                                                                      |         |                                                                                                                             |                                                                                                                                                                                                      |                                                                                                                                                                                                                                                                                                                                                                  |
| <b>Liu et al.</b>         | Retrospective cohort study | 15724 | China            | 26-28 w | maternal age at delivery, education level, employment status, parity, history of macrosomia, pre-pregnancy BMI, height, use of folic acid supplements, maternal serum concentrations of triglycerides, high density lipoprotein cholesterol, calcium and hemoglobin in the 1st trim. | 25(OH)D | Severe deficiency: <10.0 ng/mL<br>deficiency: 10.0-19.9 ng/mL<br>insufficiency: 20.0-29.9 ng/mL<br>sufficiency: >30.0 ng/mL | severely 25(OH)D deficient mothers had a decreased risk of LGA compared with those with sufficient 25(OH)D concentrations (Adjusted odds ratio (OR): 0.65; 95% confidence interval (CI): 0.43 0.96). | Compared to mothers with no 25(OH)D deficiency and no GDM, those with both 25(OH)D deficiency and GDM had 0.15 (95% CI: 0.09, 0.21) higher infant birth weight Z-score and a higher risk of LGA (OR: 1.29; 95% CI: 1.09, 1.52).<br><br>Maternal 25(OH)D deficiency and GDM had additive interaction on the risk of LGA (relative risk due to interaction: 0.18). |
| <b>Chen et al.</b>        | retrospective cohort       | 2814  | China            | 14-19 w | age, BMI, parity, season of blood collected                                                                                                                                                                                                                                          | 25(OH)D | -                                                                                                                           | the hazard ratio (HR) (95% CI) per standard deviation (SD) increase of maternal serum 25(OH)D concentrations was 0.849 (95% CI 0.726, 0.993) for LBW                                                 | Higher early pregnancy Vit D was associated with a lower risk of GDM, cesarean section, preterm birth, and LBW                                                                                                                                                                                                                                                   |
| <b>Casey et al.</b>       | Prospective HAPO study     | 1585  | Northern Ireland | 24-32 w | season of sampling, maternal age at OGTT, maternal BMI at OGTT, smoker during pregnancy, alcohol use during pregnancy, family history of diabetes,                                                                                                                                   | 25(OH)D | 25(OH)D quintiles (≤25 nmol/l, 25-01-49-9 nmol/l, 50-74-9 nmol/l, 75-99-9 nmol/l and ≥100 nmol/l)                           | birth weight standard deviation scores (SDS) and birth length SDS were significantly associated with maternal total 25(OH)D P=0.002 (95% CI 0.00-0.10) and P=0.03 (95% CI 0.01-0.13)                 | There were no significant associations with maternal 25(OH)D and other measures of neonatal anthropometrics or markers of neonatal glycaemia                                                                                                                                                                                                                     |

|                       |             |     |           |                              |                                                                                                                                                      |         |                                                                                                                                                     |                                                                                                                                                                                                                                                       |                                                                                                                                    |
|-----------------------|-------------|-----|-----------|------------------------------|------------------------------------------------------------------------------------------------------------------------------------------------------|---------|-----------------------------------------------------------------------------------------------------------------------------------------------------|-------------------------------------------------------------------------------------------------------------------------------------------------------------------------------------------------------------------------------------------------------|------------------------------------------------------------------------------------------------------------------------------------|
|                       |             |     |           |                              | gestational age at delivery, sex of neonate, parity, systolic blood pressure at OGTT, maternal height, fasting plasma glucose and maternal education |         |                                                                                                                                                     |                                                                                                                                                                                                                                                       |                                                                                                                                    |
| <b>Mosavat et al.</b> | prospective | 890 | Australia | 2 <sup>nd</sup> trim. (18 w) | Seasonal effect, maternal age, pre-pregnancy and gestational weight, race/ethnicity                                                                  | 25(OH)D | < 30 nmol/L (severe Vit D deficiency), 30–49 nmol/L (mild Vit D deficiency), 50–78 nmol/L (normal Vit D level), and > 78 nmol/L (ideal Vit D level) | Maternal serum levels of 25(OH)D were positively associated with birth weight (r = 0.10, p = 0.003), body length (r = 0.10, p = 0.005) and head circumference (r = 0.10, p = 0.007) of the neonate. No association with the risk for low birth weight | Low maternal serum levels of 25(OH)D are associated with GDM gestational diabetes, and race/ethnicity may modify this relationship |
| <b>Morley et al.</b>  | prospective | 374 | Australia | <16w & at 28-32 w            | infant sex, maternal height, whether first child, whether the mother smoked in pregnancy, and season when blood sample was taken                     | 25(OH)D | Low 25(OH)D group <28 nmol/L                                                                                                                        | Low maternal 25(OH)D in late pregnancy is associated with reduced intrauterine long bone growth [knee-heel length 4.3 mm smaller (95% CI -7.3, -1.3) & reduced mid-upper arm (0.1, 95% CI -0.06, 0.3) and slightly shorter gestation                  | no evident relationship between birth size measures and maternal 25(OH)D or PTH                                                    |
| <b>Gernand et al.</b> | prospective | 792 | USA       | 12-26 w                      | latitude, obesity status, race, treatment group, risk group,                                                                                         | 25(OH)D | Tested different cutoffs Deficiency <30                                                                                                             | Maternal Vit D status in the 2nd trim. is associated with risk of SGA                                                                                                                                                                                 | High risk for preeclampsia development study group Under treatment with low doses of aspirin                                       |

|                        |                                              |                         |                      |                       |                                                                                                                                   |         |                                                                                                                               |                                                                                                                                                                                                                                                                                                                                             |                                                                                                                                                                                                                                                          |
|------------------------|----------------------------------------------|-------------------------|----------------------|-----------------------|-----------------------------------------------------------------------------------------------------------------------------------|---------|-------------------------------------------------------------------------------------------------------------------------------|---------------------------------------------------------------------------------------------------------------------------------------------------------------------------------------------------------------------------------------------------------------------------------------------------------------------------------------------|----------------------------------------------------------------------------------------------------------------------------------------------------------------------------------------------------------------------------------------------------------|
|                        |                                              |                         |                      |                       | gestational age at blood sampling, season at blood sampling, height, marital status, smoking, education, age, and infant sex      |         | nmol/L<br>Inadequacy<br>30-50 nmol/L<br><br>Insufficiency<br><75 nmol/L                                                       | among all women, and in the subgroups of white and nonobese women<br>No association in black or obese women                                                                                                                                                                                                                                 |                                                                                                                                                                                                                                                          |
| <b>Burris et al.</b>   | prospective                                  | 1067 white<br>236 black | USA                  | 2 <sup>nd</sup> trim. | season of blood draw, maternal age, pre-pregnancy body mass index and race                                                        | 25(OH)D | severe deficiency (<25 nmol/L), deficiency (25 to <50 nmol/L), insufficiency (50 to <75 nmol/L), and sufficiency (≥75 nmol/L) | The odds of SGA were higher with maternal 25(OH)D levels <25 vs. ≥25 nmol/L (adjusted OR 3.17; 95% [CI]: 1.16, 8.63)                                                                                                                                                                                                                        | The increased odds of SGA among black vs. white participants decreased from an OR of 2.04(1.04, 4.04) to 1.68 (0.82, 3.46) after adjusting for 25(OH)D                                                                                                   |
| <b>Eckhardt et al.</b> | prospective                                  | 2473                    | USA                  | <26 w                 | infant sex, infant age, maternal pre-pregnancy BMI, socioeconomic status, race/ethnicity, season of blood draw and infant feeding | 25(OH)D | Cut point for dichotomous categorization: 30 nmol/L<br><br>Group quartiles: 30, 30–49, 50–74 and ≥75 nmol/L                   | Infants with maternal 25(OH)D ≥30 nmol/L vs <30 nmol/L had z-score for length and for head circumference measures 0.13 (95% CI 0.03–0.23) and 0.20 (95% CI 0.11–0.28) units higher, respectively, across the first year of life                                                                                                             | Low maternal Vit D status was associated with deficits at birth in infant weight and BMI that were recouped across the first year of life<br><br>associations with reduced measures of linear and skeletal growth were sustained from birth to 12 months |
| <b>Tian et al.</b>     | nested case control study (preterm and term) | 2558                    | USA                  | 4-29 weeks            | age, education, parity, pre-pregnancy body mass index, season at blood draw, and smoking                                          | 25(OH)D | -                                                                                                                             | Maternal serum concentrations of 25(OH)D in early and mid-pregnancy were positively associated with BW/GA among non-Hispanic Black male and female infants [beta (β) = 0.015, standard error (SE) = 0.007, P = 0.025; β = 0.018, SE = 0.006, P = 0.003, respectively] and non-Hispanic White male infants (β = 0.008, SE = 0.003, P = 0.02) |                                                                                                                                                                                                                                                          |
| <b>Eggemoen et al.</b> | Population based, multiethnic cohort study   | 719                     | Norway (multiethnic) | 15 & 28 w             | maternal age, parity, education, prepregnancy BMI, season,                                                                        | 25(OH)D | Consistently sufficient level (≥37nmol/l at GW 15 and 28)                                                                     | significantly associated with birth weight, head circumference,                                                                                                                                                                                                                                                                             | Sex-specific associations for abdominal circumference and sum of skinfolds were found (P for interaction <0.05)                                                                                                                                          |

|                    |                           |                                                                     |       |                                          |                                                                                                                                                                                                 |         |                                                                                                                                                                                    |                                                                                                                                                                                                                                                                                                                                    |                                                                                                                                                                                                                                                      |
|--------------------|---------------------------|---------------------------------------------------------------------|-------|------------------------------------------|-------------------------------------------------------------------------------------------------------------------------------------------------------------------------------------------------|---------|------------------------------------------------------------------------------------------------------------------------------------------------------------------------------------|------------------------------------------------------------------------------------------------------------------------------------------------------------------------------------------------------------------------------------------------------------------------------------------------------------------------------------|------------------------------------------------------------------------------------------------------------------------------------------------------------------------------------------------------------------------------------------------------|
|                    |                           |                                                                     |       |                                          | gestational age and neonate sex                                                                                                                                                                 |         | consistently deficient level (<37nmol/l at GW 15 and 28) increasing level (<37nmol/l at GW 15 and ≥37nmol/l at GW 28) decreasing level (≥37nmol/l at GW 15 and <37nmol/l at GW 28) | abdominal circumference and ponderal index (P<0.05 for all), when used as a continuous variable and categorized<br><br>After adjusting for ethnicity, 25(OH)D was no longer associated with any of the outcomes                                                                                                                    |                                                                                                                                                                                                                                                      |
| <b>Wen et al.</b>  | nested case-control study | 1635 (545 women who delivered a macrosomic neonate & 1090 controls) | China | 2 <sup>nd</sup> or 3 <sup>rd</sup> trim. | maternal age, birthplace, intrapartum BMI, gestational weeks at birth, fetus gender, status of gestational diabetes, parity, sampling trimester, abnormal pregnancy history and sampling season | 25(OH)D | <25.0, 25.0–37.4, 37.5–49.9, <50.0, >75.0 nmol/L vs. 50.0–74.9 nmol/L)                                                                                                             | Among women who delivered infant with macrosomia, 71.2% of the women had serum 25(OH)D concentrations <50.0 nmol/L compared with 61.1% of the control women (P < 0.001). For women with concentrations <50.0 nmol/L, they had a 33% increased risk of macrosomia compared with women whose 25(OH)D ranged from 50.0 to 74.9 nmol/L | The risk of macrosomia was significantly increased with the decreasing concentrations of serum 25(OH)D in a dose-dependent manner (P for trend = 0.001). Maternal serum 25(OH)D <50.0 nmol/L was associated with the delivery of a macrosomic infant |
| <b>Tint et al.</b> | prospective               | 292                                                                 | Asian | 26-28 w                                  | maternal glycemic status                                                                                                                                                                        | 25(OH)D | inadequate ≤75.0 nmol/L<br>sufficient >75.0 nmol/L                                                                                                                                 | Neonates of mothers with mid-gestation 25(OH)D inadequacy had a higher abdominal subcutaneous                                                                                                                                                                                                                                      | Each 1 nmol/L increase in 25(OH)D was associated with a reduction in superficial subcutaneous adipose tissue (β=-0.14 ml; 95% CI: -0.24, -0.04 ml, P = 0.006) and deep                                                                               |

|                      |                                         |                                                                                                  |        |                 |                                                                                                                                                                                                                                                                                |         |                                                |                                                                                                                                                                                                                      |                                                                                                                                                                                                                                                                                        |
|----------------------|-----------------------------------------|--------------------------------------------------------------------------------------------------|--------|-----------------|--------------------------------------------------------------------------------------------------------------------------------------------------------------------------------------------------------------------------------------------------------------------------------|---------|------------------------------------------------|----------------------------------------------------------------------------------------------------------------------------------------------------------------------------------------------------------------------|----------------------------------------------------------------------------------------------------------------------------------------------------------------------------------------------------------------------------------------------------------------------------------------|
|                      |                                         |                                                                                                  |        |                 |                                                                                                                                                                                                                                                                                |         |                                                | adipose tissue volume, especially deep subcutaneous adipose tissue ( $r = -0.206$ , $P < 0.001$ ) which is metabolically similar to visceral adipose tissue in adults                                                | subcutaneous adipose tissue ( $\beta = -0.04$ ml; 95% CI: $-0.06$ , $-0.01$ ml, $P = 0.006$ ), but was not associated with internal adipose tissue                                                                                                                                     |
| <b>Godang et al.</b> | prospective                             | 202                                                                                              | Norway | 14-16 & 30-32 w | maternal BMI                                                                                                                                                                                                                                                                   | 25(OH)D | -                                              | Neonatal total body fat mass was positively associated with umbilical cord plasma 25(OH)D, $P=0.02$<br><br>Umbilical cord plasma - but not maternal - 25(OH)D was a significant predictor of neonatal total fat mass | Maternal and umbilical cord plasma 25(OH)D levels varied significantly with season<br><br>However, a strong positive association between maternal 25(OH)D and umbilical cord plasma 25(OH)D was reported $\beta=0.42$ , $P<0.001$ )                                                    |
| <b>Bodnar et al.</b> | nested case-control study retrospective | 412 SGA infants (n = 77 white and n = 34 black) non-SGA infants (n = 196 white and n = 105 black | USA    | 22 w            | Race/ethnicity, pre-pregnancy BMI, smoking status, season of sample collection, marital status, private insurance, use of periconceptional multivitamins at least once per week, any pre-pregnancy physical activity, and intensity of physical activity, socioeconomic status | 25(OH)D | deficiency <37.5 nmol/L sufficiency.>75 nmol/L | U-shaped relation between serum 25(OH)D and risk of SGA among white mothers ( $P<0.0001$ ), with the lowest risk from 60 to 80 nmol/L<br><br>There was no relation between 25(OH)D and SGA risk among black mothers  | Compared with serum 25(OH)D 37.5–75 nmol/L, SGA odds ratios (95% CI) for levels <37.5 and >75 nmol/L were 7.5 (1.8, 31.9) and 2.1 (1.2, 3.8), respectively<br><br>One SNP in the Vit D receptor gene among white women and 3 SNP in black women were significantly associated with SGA |
| <b>Yu et al.</b>     | retrospective                           | 10,586                                                                                           | China  | 13-27 w         | Gestational                                                                                                                                                                                                                                                                    | 25(OH)D | Deficiency <50                                 | With the increase in                                                                                                                                                                                                 | Low maternal Vit D levels were                                                                                                                                                                                                                                                         |



|                                 |                                     |                                                                                           |                           |                                           |                                                                                                                                                                                   |         |                                                                           |                                                                                                                                                                                             |                                                                                                                                                                                                                |
|---------------------------------|-------------------------------------|-------------------------------------------------------------------------------------------|---------------------------|-------------------------------------------|-----------------------------------------------------------------------------------------------------------------------------------------------------------------------------------|---------|---------------------------------------------------------------------------|---------------------------------------------------------------------------------------------------------------------------------------------------------------------------------------------|----------------------------------------------------------------------------------------------------------------------------------------------------------------------------------------------------------------|
|                                 | cohort                              |                                                                                           |                           |                                           | diabetes, high blood pressure, parity, pre-pregnancy BMI, maternal age, occupation, education, gestational age at birth, fetal sex, complications, and season of blood collection |         | nmol/L<br>Insufficiency<br>50–75 nmol/L                                   | 25(OH)D levels, the risk of SGA and LGA tended to increase and decrease, respectively. However, 25(OH)D concentration was not an effective predictor of SGA or LGA                          | not associated with SGA or LGA                                                                                                                                                                                 |
| <b>Boyle et al.</b>             | prospective cohort                  | 1710                                                                                      | New Zealand (multiethnic) | 15 weeks                                  | Maternal BMI, ethnicity                                                                                                                                                           | 25(OH)D | -                                                                         | Maternal 25(OH)D concentration was not associated with development of preeclampsia, spontaneous preterm birth or SGA infants                                                                |                                                                                                                                                                                                                |
| <b>Zhou et al.</b>              | prospective                         | 1953                                                                                      | China                     | 16-20 w                                   | maternal age, systolic/diastolic pressure, pre-pregnancy body mass index and serum calcium                                                                                        | 25(OH)D | Low levels ≤20 ng/ml<br>medium levels 21-29 ng/ml<br>high level ≥30 ng/ml | No significant associations with neonatal outcomes reported                                                                                                                                 | higher prevalence of gestational diabetes and preterm delivery in women with high level of Vit D                                                                                                               |
| <b>3<sup>rd</sup> trimester</b> |                                     |                                                                                           |                           |                                           |                                                                                                                                                                                   |         |                                                                           |                                                                                                                                                                                             |                                                                                                                                                                                                                |
| <b>Bärebring et al.</b>         | Prospective cohort study            | 2052<br><br>trimester 1<br>2046<br><br>Trimester 3<br>1816<br><br>Both trimesters<br>1810 | Sweden                    | 1 <sup>st</sup> and 3 <sup>rd</sup> trim. | season of conception, origin, Vit D supplementation, Vit D status trajectory Tobacco use, exclusion of preeclampsia cases                                                         | 25(OH)D | deficiency<br>25(OH)D < 30 nmol/L                                         | 1st trim.: No associations<br><br>3rd trim.: 25(OH)D ≥100 nmol/L was associated with lower odds of SGA (OR 0.3, p = 0.031) and LBW (OR 0.2, p = 0.046), compared to Vit D deficient mothers | Women with a ≥30 nmol/L increment in 25(OH)D from T1 to T3 had the lowest odds of SGA, LBW and preterm delivery<br><br>Lower 25(OH)D in early pregnancy was only associated with pregnancy loss                |
| <b>Shakeri et al.</b>           | Longitudinal, cross-sectional study | 88                                                                                        | Iran                      | 3 <sup>rd</sup> trim.                     | -                                                                                                                                                                                 | 25(OH)D | -                                                                         | Neonatal mean birth weight, length, and head circumference of mothers who were on the 3rd tercile of 25(OH)D serum level was significantly higher                                           | women in the 1st tercile had shorter infants compared to women in the 3rd tercile of Vit D serum levels (p = 0.004)<br><br>The OR confirmed that Vit D deficiency and insufficiency could predict 1.3 and 1.32 |

|                          |                 |      |           |                       |                                                                                                                                                                                                                                                                        |         |                                                                                                         |                                                                                                                                                                            |                                                                                                                                                                                                         |
|--------------------------|-----------------|------|-----------|-----------------------|------------------------------------------------------------------------------------------------------------------------------------------------------------------------------------------------------------------------------------------------------------------------|---------|---------------------------------------------------------------------------------------------------------|----------------------------------------------------------------------------------------------------------------------------------------------------------------------------|---------------------------------------------------------------------------------------------------------------------------------------------------------------------------------------------------------|
|                          |                 |      |           |                       |                                                                                                                                                                                                                                                                        |         |                                                                                                         | than those in the 1st tercile ( $p < 0.001$ , $p = 0.004$ and $p < 0.001$ , respectively)                                                                                  | times lower birth weight and lower infants' length at birth, respectively<br><br>Vit D deficiency and insufficiency could predict 1.29 times infants with head circumference (HC) under 25th percentile |
| <b>Wierzejska et al.</b> | cross-sectional | 94   | Poland    | term                  | Vit D and calcium consumption, gravidity, maternal age and education, pre-pregnancy BMI, weight gain during pregnancy, smoking, caffeine consumption, use of dietary supplements, professional activity during pregnancy, gestational diabetes, and sex of the neonate | 25(OH)D | Severe deficiency <10 ng/ml<br>Deficiency 20-30 ng/ml<br>Insufficiency 20-30 ng/ml<br>Optimal >30 ng/ml | No relationship between maternal and neonatal cord blood Vit D concentrations vs. neonatal weight, length, head, and chest circumference at birth was found ( $p > 0.05$ ) |                                                                                                                                                                                                         |
| <b>Velkavrh et al.</b>   | prospective     | 73   | Slovenian | 3 <sup>rd</sup> trim. | -                                                                                                                                                                                                                                                                      | 25(OH)D | deficiency <50 nmol/L<br>insufficiency 50-75 nmol/L<br>sufficiency 75-125 nmol/L                        | no significant association between maternal 25(OH)D and newborn's anthropometric measures at birth (weight $p=0.35$ , length $p=0.59$ and head circumference $p=0.47$ )    |                                                                                                                                                                                                         |
| <b>Wang et al.</b>       | prospective     | 1978 | China     | At delivery           | maternal age, pre-pregnancy BMI, gestational age, season of blood draw, trimester, GDM, preeclampsia, Vit D supplemental, Vit D-calcium co-                                                                                                                            | 25(OH)D | -                                                                                                       | Maternal Vit D deficiency significantly increased the risk of neonatal low birth weight (LBW) (aOR 2.83; $P = 0.005$ ) and small-for-gestational-age                       | maternal Vit D deficiency independently increased the risk of gestational diabetes mellitus (GDM) (adjust OR, aOR 1.08; $P = 0.026$ )                                                                   |

|                       |                                 |                               |            |             |                                                                                                               |          |                                                                                 |                                                                                                                                                                                                                      |                                                                                |
|-----------------------|---------------------------------|-------------------------------|------------|-------------|---------------------------------------------------------------------------------------------------------------|----------|---------------------------------------------------------------------------------|----------------------------------------------------------------------------------------------------------------------------------------------------------------------------------------------------------------------|--------------------------------------------------------------------------------|
|                       |                                 |                               |            |             | supplementation, birth weight, infant gender, preterm delivery, IUGR, SGA, neonatal/maternal Vit D deficiency |          |                                                                                 | (SGA) (aOR 1.17; P = 0.015).<br><br>Vit D supplementation during pregnancy significantly reduced the risk of giving birth to LBW infants (OR = 0.47, 95%CI = 0.33-0.68, P<0.001).                                    |                                                                                |
| <b>Arora et al.</b>   | prospective                     | 200                           | India      | At delivery | adjusted                                                                                                      | 25(OH)D  | Deficiency <20 ng/ml<br>Insufficiency <32 ng/ml                                 | significant association of hypovitaminosis D with low-birth-weight neonates (p = 0.01).                                                                                                                              | consecutive deliveries (included pregnancy pathology, preterm births etc)      |
| <b>Kawakib et al.</b> | prospective                     | 100 elective cesarean section | Iraq       | At delivery | -                                                                                                             | 25(OH)D3 | Deficiency <20 ng/mL<br>Insufficiency 20-29.9 ng/mL<br>Normal ≥ 30 ng/mL        | Vit D deficiency among pregnant women can be directly linked with adverse neonatal outcomes like low Apgar score, low birth weight and head circumference, and respiratory distress syndrome (p<0.001)               |                                                                                |
| <b>Lee et al.</b>     | prospective observational study | 575                           | Malaysia   | At delivery | maternal age and BMI                                                                                          | 25(OH)D  | Deficiency <20 ng/mL<br>Insufficiency 20-29 ng/mL<br>Adequacy ≥30 ng/mL         | no statistically significant association between Vit D status with maternal and neonatal outcomes (low birth weight baby and neonatal intensive care unit admission) among the three groups of Vit D status (p>0.05) | GDM prevalence was higher in pregnant women with Vit D deficiency (p = 0.024). |
| <b>Laird et al.</b>   | prospective                     | 172                           | Seychelles | At delivery | maternal MeHg, child's sex, alcohol and tobacco use in pregnancy, diabetes, gestational age, maternal age,    | 25(OH)D  | Deficiency <30 nmol/L<br>Insufficiency 30-49.9 nmol/L<br>Sufficiency ≥50 nmol/L | Maternal 25(OH)D concentrations were not associated with child anthropometric or neurodevelopmental outcomes                                                                                                         | Small Vit D variability as Vit D sufficient mothers were 98% of sample         |

|                                                                |                                   |                                                      |         |                                            |                                                                                                                                             |          |                                                                            |                                                                                                                                                                                                                                                                      |                                                                                                                                                                                                                                                                                                          |
|----------------------------------------------------------------|-----------------------------------|------------------------------------------------------|---------|--------------------------------------------|---------------------------------------------------------------------------------------------------------------------------------------------|----------|----------------------------------------------------------------------------|----------------------------------------------------------------------------------------------------------------------------------------------------------------------------------------------------------------------------------------------------------------------|----------------------------------------------------------------------------------------------------------------------------------------------------------------------------------------------------------------------------------------------------------------------------------------------------------|
|                                                                |                                   |                                                      |         |                                            | delivery weight gain, maternal BMI at enrolment, mean DHA and mean AA concentrations, Hollingshead SES, and number of other living children |          |                                                                            | A higher Vit D status was not a limiting factor for neonatal growth or neurocognitive development in the first 5 years of life                                                                                                                                       |                                                                                                                                                                                                                                                                                                          |
| <b>Sandal et al.</b>                                           | prospective                       | 45                                                   | Turkey  | At delivery                                | -                                                                                                                                           | 25(OH)D3 | Vit D deficient group <20 ng/mL<br>Vit D sufficient group >20 ng/mL        | No significant differences on neonatal anthropometric parameters at birth                                                                                                                                                                                            | The primary outcome of the study was the association of circulating sclerostin and neonatal parameters                                                                                                                                                                                                   |
| <b>Dullaert et al.</b>                                         | prospective cohort                | 240                                                  | Belgium | At delivery                                | parity, maternal age, fetal sex, gestational diabetes, maternal glucose level, and preeclampsia                                             | 25(OH)D  | Deficiency ≤20 ng/mL<br>Insufficiency 21-29 ng/mL                          | significant association was found between Vit D level <10 ng/mL and birthweight <10th percentile, but in multivariate analysis there was no significant contribution from low Vit D<br><br>Maternal Vit D at delivery does not correlate with birthweight percentile |                                                                                                                                                                                                                                                                                                          |
| <b>MohammadBeigi</b>                                           | descriptive cross-sectional study | 106<br><br>53 Iranians and 53 Afghan refugees' women | Iran    | At delivery                                | Gestational age                                                                                                                             | 25(OH)D  | Deficiency <10 ng/mL<br>Insufficiency 10-30 ng/mL<br>Sufficiency >30 ng/mL | Maternal and neonatal 25(OH) D levels did not influence neonatal anthropometry                                                                                                                                                                                       | there was a significant correlation between maternal serum 25(OH)D and that of their neonates (P=0.000, R=0.62)                                                                                                                                                                                          |
| <b>Longitudinal measurements of Vit D throughout pregnancy</b> |                                   |                                                      |         |                                            |                                                                                                                                             |          |                                                                            |                                                                                                                                                                                                                                                                      |                                                                                                                                                                                                                                                                                                          |
| <b>Francis et al.</b>                                          | prospective cohort                | 321                                                  | USA     | 10-14 w<br>15-26 w<br>23-31 w &<br>33-39 w | maternal age, race/ethnicity, gestational age at blood draw, education, pre-pregnancy BMI, marital status and insurance                     | 25(OH)D  | Cutoffs <50 nmol/L,<br>50–75 nmol/L,<br>& >75 nmol/L                       | women with an overweight/obese BMI: 25(OH)D <50 nmol/L at 10-14 w was associated with lower birthweight z-score (0.56; 95% CI: -0.99, -0.13) and length (-1.56 cm; 95% CI: -3.07, -0.06)                                                                             | women with normal BMI: 25(OH)D <50 nmol/L at 10-14 w was associated with lower sum of skinfolds (-2.64 mm; 95% CI: -5.03, -0.24), at 23-31 GW was associated with larger birthweight z-scores (0.64; 95% CI: 0.03, 1.25), and at 33-39 w with both higher birthweight z-score (1.22; 95% CI: 0.71, 1.73) |

|                          |                                      |                                              |                     |                                             |                                                                                                                                                     |         |                                                                                    |                                                                                                                                                                                                                                                                   |                                                                                                                                                                                                                                                                                                                                                                                  |
|--------------------------|--------------------------------------|----------------------------------------------|---------------------|---------------------------------------------|-----------------------------------------------------------------------------------------------------------------------------------------------------|---------|------------------------------------------------------------------------------------|-------------------------------------------------------------------------------------------------------------------------------------------------------------------------------------------------------------------------------------------------------------------|----------------------------------------------------------------------------------------------------------------------------------------------------------------------------------------------------------------------------------------------------------------------------------------------------------------------------------------------------------------------------------|
|                          |                                      |                                              |                     |                                             |                                                                                                                                                     |         |                                                                                    | at 23-31 w was associated with shorter length (-2.77 cm; 95% CI: -13.38, -4.98) and lower sum of skinfolds (-9.18 mm; 95% CI: -13.38, -4.98)                                                                                                                      | and longer length (1.94 cm; 95% CI: 0.37, 3.52)                                                                                                                                                                                                                                                                                                                                  |
| <b>Boghossian et al.</b> | retrospective                        | 252<br>(220 African American, 32 Caucasians) | USA<br>(interacial) | 11-21 w<br>26-29 w<br>36 w                  | maternal ethnicity/race, age, body mass index, smoking statu, caloric intake, corrected serum calcium, and newborn sex                              | 25(OH)D | Deficiency <20 ng/ml<br>Insufficiency 20–29 ng/ml<br>Sufficiency >29 ng/ml         | Newborns of deficient mothers had lower total bone mineral density ( $\beta$ -0.009 g/cm <sup>2</sup> ; 95% CI -0.016, -0.002), while lean mass (-217 g; -391, -43) and birthweight (-308 g; -540, -76) were significantly negatively associated among males only |                                                                                                                                                                                                                                                                                                                                                                                  |
| <b>Benaïm et al.</b>     | Prospective cohort                   | 168                                          | Brazil              | 5-13w<br>20-26w<br>30-36w<br>All trimesters | maternal education, early pregnancy BMI, skin colour, smoking habit, alcohol consumption and energy intake                                          | 25(OH)D | sufficiency $\geq$ 50 nmol/L;<br>insufficiency <50 nmol/L                          | Mean rate of change during pregnancy in 25(OH)D was directly associated with birthweight z-score ( $\beta$ =0.36, 95% CI 0.07, 0.65), LGA risk (IRR: 1.97, 95% CI 1.07; 3.63) and preterm birth (IRR: 7.35, 95% CI 2.99; 18.07).                                  |                                                                                                                                                                                                                                                                                                                                                                                  |
| <b>Chen et al.</b>       | Prospective, population-based cohort | 3658                                         | China               | Any stage of pregnancy                      | BMI before pregnancy, maternal age and season of blood sample, maternal socioeconomic status, maternal periconceptional multivitamin use and parity | 25(OH)D | Deficiency <20 ng/mL<br>Insufficiency 20-29.9 ng/mL<br>Sufficiency $\geq$ 30 ng/mL | positive correlation between maternal serum 25(OH)D level and offspring birth weight (r=0.477, P<0.001)                                                                                                                                                           | After adjustment for confounders, relative risk (RR) for LBW infants was 12.31 (95% CI: 4.47, 33.89) among subjects with Vit D deficiency and 3.15 (95% CI: 1.06, 9.39) among subjects with Vit D insufficiency<br><br>RR for SGA infants was 6.47 (95%CI: 4.30, 9.75) among subjects with Vit D deficiency and 2.01 (95%CI: 1.28, 3.16) among subjects with Vit D insufficiency |
| <b>Bo Chen et al.</b>    | prospective                          | 3080<br>(included                            | China               | >8 w                                        | Maternal age, gestational age,                                                                                                                      | 25(OH)D | deficiency: <50 nmol/L,                                                            | In the Vit D deficient group, the                                                                                                                                                                                                                                 | inclusion of cases with gestational pathology                                                                                                                                                                                                                                                                                                                                    |

|                                    |                                 |                                            |        |           |                                                                                                                                                                                                                            |         |                                                                                 |                                                                                                                                                                                                                                                            |                                                                                                                                                                                                                                                         |
|------------------------------------|---------------------------------|--------------------------------------------|--------|-----------|----------------------------------------------------------------------------------------------------------------------------------------------------------------------------------------------------------------------------|---------|---------------------------------------------------------------------------------|------------------------------------------------------------------------------------------------------------------------------------------------------------------------------------------------------------------------------------------------------------|---------------------------------------------------------------------------------------------------------------------------------------------------------------------------------------------------------------------------------------------------------|
|                                    |                                 | pathology)                                 |        |           | season, education level, weekly time outdoors, Vit D supplement, calcium supplement and trace element supplement during pregnancy                                                                                          |         | insufficiency: 50 - 75 nmol/L<br>sufficiency: $\geq 75$ nmol/L                  | occurrence of spontaneous abortion and SGA was higher than those of other groups (P=.018 & P=.016 respectively)                                                                                                                                            |                                                                                                                                                                                                                                                         |
| <b>Pereira-Santos et al.</b>       | prospective                     | 327                                        | Brazil | Up to 34w | maternal education level, time of onset of prenatal care, number of consultations, maternal BMI, gestational age, neonatal sex, maternal smoking, use of closed clothing season, socioeconomic class and maternal religion | 25(OH)D | Deficient <50 nmol/l,<br>insufficient 50–75 nmol/l and<br>sufficient >75 nmol/l | Vit D serum concentration had a direct and statistically significant association with birth weight<br>Each nmol increase in maternal Vit D serum concentration correlated with an increase in birth weight of 3,06 (95 % CI -1.37, 4.75) g (P $\leq$ 0.01) |                                                                                                                                                                                                                                                         |
| <b>RCTs and Systematic Reviews</b> |                                 |                                            |        |           |                                                                                                                                                                                                                            |         |                                                                                 |                                                                                                                                                                                                                                                            |                                                                                                                                                                                                                                                         |
| <b>Fang et al.</b>                 | metanalysis                     | 16 studies                                 |        |           |                                                                                                                                                                                                                            |         |                                                                                 | maternal Vit D deficiency led to an increased risk of a low birthweight neonate (OR = 2.39, 95% CI: 1.25-4.57)                                                                                                                                             | neonates of deficient mothers had a lower birthweight of only 0.08 kgr (95% CI: -0.10 to -0.06) compared to controls                                                                                                                                    |
| <b>Santamaria et al.</b>           | Systematic review & metanalysis | 30 studies<br>35032 mother-offspring pairs |        |           |                                                                                                                                                                                                                            |         |                                                                                 | Low prenatal Vit D levels were associated with lower birth weight (mean difference MD -100.69; 95% CI -162.25, -39.13), increased risk of small-for-gestational-age (OR 1.55; 95% CI 1.16,                                                                 | No associations were observed between prenatal Vit D status and other growth parameters at birth, age 1 year, 4-6 years or 9 years, nor with diabetes type 1<br><br>Prenatal Vit D may play a role in infant adiposity and accelerated postnatal growth |

|                           |                                           |                               |  |  |  |  |  |                                                                                                                                                                                                                                                                                                                                                                                                                                                                                                 |  |
|---------------------------|-------------------------------------------|-------------------------------|--|--|--|--|--|-------------------------------------------------------------------------------------------------------------------------------------------------------------------------------------------------------------------------------------------------------------------------------------------------------------------------------------------------------------------------------------------------------------------------------------------------------------------------------------------------|--|
|                           |                                           |                               |  |  |  |  |  | 2.07) and an elevated weight in infant at the age of 9 months (MD 119.75; 95% CI 32.97, 206.52)                                                                                                                                                                                                                                                                                                                                                                                                 |  |
| <b>Tous et al.</b>        | Systematic review and metanalysis         | 54                            |  |  |  |  |  | <p>Vit D deficient mothers (&lt;30 nmol/L) had neonates with lower birthweight (MD -87.82g; 95% CI -119.73, -55.91 g), head circumference (MD -0.19 cm; 95% CI -0.32, -0.06 cm) and a higher risk of small for gestational age infants (OR 1.59; 95% CI 1.24, 2.03) compared to mothers with Vit D levels ≥30 nmol/L.</p> <p>Vit D insufficiency (&lt;50 nmol/L) was associated with a higher risk of SGA and PTB (OR 1.43; 95% CI 1.08, 1.91 and OR 1.28; 95% CI 1.08, 1.52, respectively)</p> |  |
| <b>De-Regil et al.</b>    | Cohrane metanalysis                       | 15 trials<br>2833 women       |  |  |  |  |  | <p>Vit D supplemented women during pregnancy, less frequently had a baby with a birthweight below 2500 g than those receiving no intervention or placebo (RR 0.40; 95% CI 0.24 to 0.67, moderate quality)</p> <p>There was also some indication that Vit D supplementation increases infant length (mean difference (MD) 0.70, 95% CI -0.02 to 1.43; four trials, 638 infants) and head circumference at birth (MD 0.43, 95% CI 0.03 to 0.83; four trials, 638 women)</p>                       |  |
| <b>Aghajafari et al.</b>  | Systematic review and metanalysis         | 31 studies                    |  |  |  |  |  | <p>Maternal 25(OH)D insufficiency was associated with small for gestational age infants (1.85, 1.52 to 2.26).</p> <p>Pregnant women with low serum 25(OH)D levels had an increased risk of bacterial vaginosis and low birthweight infants</p>                                                                                                                                                                                                                                                  |  |
| <b>Pérez-López et al.</b> | Systematic review and metanalysis of RCTs | 13 trials<br>2299 pregnancies |  |  |  |  |  | <p>Birth weight and birth length were significantly greater for neonates in the Vit D supplemented group; mean difference: 107.6 g (95% CI 59.9-155.3</p> <p>Incidence of preeclampsia, GDM, SGA, low birth weight, preterm birth, and cesarean section were not influenced by Vit D supplementation</p>                                                                                                                                                                                        |  |

|  |  |  |  |  |  |  |  |                                                         |  |
|--|--|--|--|--|--|--|--|---------------------------------------------------------|--|
|  |  |  |  |  |  |  |  | g) and 0.3 cm (95%<br>CI 0.10-0.41 cm),<br>respectively |  |
|--|--|--|--|--|--|--|--|---------------------------------------------------------|--|

Table S2: Studies on the effects of maternal Vit D status during gestation on neonatal anthropometric indices. FGR: fetal growth restriction, SGA: small for gestational age, EFW: estimated fetal weight, AGA: appropriate for gestational age, LGA: large for gestational age, GDM: gestational diabetes mellitus, LBW: low birthweight, HC: head circumference, PTB: preterm birth, SNP: single nucleotide polymorphism
