# Supplementary material for: The Gestational Effects of Maternal Bone Marker Molecules on Fetal Growth, Metabolism and Long-Term Metabolic Health: A Systematic Review
Source: MDPI journal article supplement (doi:10.3390/ijms23158328), 2022-07-28
Supplement: s1 [file s1]

| Author                   | Type of study                  | N                      | Ethnicity | Marker studied | Trimester of serum measurement                      | Marker Cutoffs                                                                                                  | Adjusted for covariates                                                                         | Results                                                                                                                                                                                                                                                                                                                                                                                                                                                      | Others |
|--------------------------|--------------------------------|------------------------|-----------|----------------|-----------------------------------------------------|-----------------------------------------------------------------------------------------------------------------|-------------------------------------------------------------------------------------------------|--------------------------------------------------------------------------------------------------------------------------------------------------------------------------------------------------------------------------------------------------------------------------------------------------------------------------------------------------------------------------------------------------------------------------------------------------------------|--------|
| <i>Zhang et al.</i>      | retrospective cohort study     | 15651                  | China     | 25(OH)D        | 1st trimester                                       | Vit D sufficiency > 50 nmol/L<br>Vit D insufficiency/deficiency < 50 nmol/L                                     | -                                                                                               | In Vit D insufficiency/deficiency group, CRL was decreased ( $P = 0.005$ ), and the risk of early FGR was increased by 13% (95% CI 1.04–1.24, $P = 0.004$ ) compared to the Vit D sufficient group.<br><br>There was a significant combined effect of maternal Vit D concentrations and overweight/obesity on CRL ( $P$ for interaction = 0.02) and the risk of early FGR ( $P$ for interaction = 0.07).                                                     |        |
| <i>Aydeniz et al.</i>    | retrospective, cross sectional | 154                    | Turkey    | 25(OH)D3       | 1 <sup>st</sup> trimester (12-14 w)                 | Group 1 <10 ng/ml<br>Group 2 >10–16 ng/ml<br>Group 3 >16–20 ng/ml<br>Group 4 >20–30 ng/ml<br>Group 5 >30 ng/ml. | -                                                                                               | No relationship between maternal vitamin D levels and neonatal birth weight and length.                                                                                                                                                                                                                                                                                                                                                                      |        |
| <i>Judistiani et al.</i> | prospective                    | 203                    | Indonesia | Vitamin D      | 1st                                                 | deficient < 20 ng/mL)<br>insufficient 20–29.99 ng/mL<br>normal $\geq 30$ ng/mL).                                | maternal age, pre-pregnancy body mass index, parity, serum ferritin level, and hemoglobin level | Maternal serum vitamin D showed significant associations with biparietal diameter ( $\beta = 0.141$ , $p = 0.042$ ) and abdominal circumference ( $\beta = 0.819$ , $p = 0.001$ ) after adjustment with                                                                                                                                                                                                                                                      |        |
| <i>Lee et al.</i>        | prospective                    | 245                    | Korean    | 25(OH)D        | 12-14<br>20-22<br>32-34 w<br>(VitD and ultrasounds) | deficiency <20 ng/mL                                                                                            | -                                                                                               | Negative correlation between serum 25(OH)D level at 12-14 weeks and growth velocity of fetal biparietal diameter between 20-22 and 32-34 weeks.<br>Positive correlation between the difference of serum 25(OH)D levels between 12-14 and 20-22 weeks and growth velocity of fetal biparietal diameter between 20-22 and 32-34 weeks<br><br>The changes of 25(OH)D levels between 12-14 and 20-22 weeks are important for growth of fetal biparietal diameter |        |
| <i>Morales et al.</i>    | prospective                    | n=2221<br>Femur length | Spain     | 25(OH)D3       | 13-15 w                                             | deficit <20 ng/mL                                                                                               | -                                                                                               | Maternal deficit of 25(OH)D3 was associated with increased risk of fetal                                                                                                                                                                                                                                                                                                                                                                                     |        |

|                                |                       |                                                                                                                          |         |         |                                                                 |                                                                                                                                        |   |                                                                                                                                                                                                                                                                                                                                                                                                                                                                                                   |
|--------------------------------|-----------------------|--------------------------------------------------------------------------------------------------------------------------|---------|---------|-----------------------------------------------------------------|----------------------------------------------------------------------------------------------------------------------------------------|---|---------------------------------------------------------------------------------------------------------------------------------------------------------------------------------------------------------------------------------------------------------------------------------------------------------------------------------------------------------------------------------------------------------------------------------------------------------------------------------------------------|
|                                |                       | <p>n=2166<br/>Biparietal diameter</p> <p>n=2210<br/>Estimated fetal growth</p> <p>n=2219<br/>Abdominal circumference</p> |         |         |                                                                 |                                                                                                                                        |   | <p>overweight defined as AC <math>\geq</math> 90th percentile (odds ratio (OR) = 1.50, 95% confidence interval (CI): 1.01–2.21; P = 0.041) or either as EFW <math>\geq</math> 90th percentile (OR = 1.47, 95% CI: 1.00–2.16; P = 0.046).</p> <p>Deficit of 25(OH)D3 was associated with an increased risk of overweight in offspring at age 1 year (OR = 1.42, 95% CI: 1.02–1.97; P = 0.039).</p> <p>The association was attenuated at age 4 years (OR = 1.19, 95% CI: 0.83–1.72; P = 0.341).</p> |
| <i>Walsh et al.</i>            | prospective           | 60                                                                                                                       | Ireland | 25(OH)D | <p>Early gestation and at 28w</p> <p>U/S at 20 and 34 weeks</p> | sufficient > 50 nmol/L at high risk of deficiency <30 nmol/L                                                                           | - | <p>Winter cohort: correlation between early pregnancy 25(OH)D and FL at 20w (r=0.34, P=.07) &amp; between 28-week 25(OH)D and FL at 34w (P=.02).</p> <p>Infant length was shorter in mothers with early pregnancy 25(OH)D levels below median (52.1 vs. 53.6 cm, P=.04)</p> <p>There are marked seasonal variation of 25(OH)D levels</p>                                                                                                                                                          |
| <i>Fernández-Alonso et al.</i> | Cross sectional       | 498 (CRL)<br>487 (NT)                                                                                                    | Spain   | 25(OH)D | 1st trimester                                                   | <p>adequate &gt;30 ng/mL</p> <p>insufficient 20–29.99 ng/mL</p> <p>deficient &lt;20 ng/mL)</p>                                         | - | No correlation with CRL and NT measurements                                                                                                                                                                                                                                                                                                                                                                                                                                                       |
| <i>Marçal et al.</i>           | cross-sectional study | 87                                                                                                                       | Brazil  | 25(OH)D | 26-36w                                                          | <p>Deficiency &lt;20ng/mL (50nmol/L)</p> <p>insufficiency 20 - 30ng/mL (50–75nmol/L)</p> <p>sufficiency 30–100ng/mL (75–250nmol/L)</p> | - | No differences in maternal vit D among pregnant women with AGA, SGA, or FGR fetuses (r= -0.06, p=0.551)                                                                                                                                                                                                                                                                                                                                                                                           |
| <i>Liu et al.</i>              | Prospective cohort    | 10913                                                                                                                    | China   | 25(OH)D | 24-28 w                                                         | Deficiency < 20 ng/mL                                                                                                                  | - | Maternal 25(OH)D deficiency and GDM were independently associated with an increased risk of excessive fetal growth. The combination of the two was associated with an increased risk of excessive fetal growth assessed by EFW Z-score (OR: 1.36, CI: 1.15-                                                                                                                                                                                                                                       |

|                       |                                      |                 |             |                      |                      |                                                                                       |                                                                  |                                                                                                                                                                                                                                                                                                                                                                |
|-----------------------|--------------------------------------|-----------------|-------------|----------------------|----------------------|---------------------------------------------------------------------------------------|------------------------------------------------------------------|----------------------------------------------------------------------------------------------------------------------------------------------------------------------------------------------------------------------------------------------------------------------------------------------------------------------------------------------------------------|
|                       |                                      |                 |             |                      |                      |                                                                                       |                                                                  | 1.62) and AC Z-score (OR: 1.32, CI: 1.11-1.56)<br><br>Maternal 25(OH)D deficiency and GDM may jointly increase the risk of excessive fetal growth.                                                                                                                                                                                                             |
| <i>Sarma et al.</i>   | prospective cohort                   | 250             | India       | 25(OH)D              | 3rd trim.            | Deficiency <20 ng/ml<br>insufficiency 21-29 ng/ml                                     | -                                                                | Fetal femur length and birth length were significantly shorter in mothers with low Vitamin D (r = 0.60, P < 0.01 and r = 0.611, P < 0.01 respectively)<br><br>No significant associations were noted between birth weight and head circumference and maternal Vitamin D levels                                                                                 |
| <i>Young et al.</i>   | Prospective longitudinal             | 171 adolescents | USA         | 25(OH)D & 1,25(OH)2D | Mid-gestation (26 w) | insufficiency <50 nmol/L                                                              | Maternal smoking, height, race, weight gain, and gestational age | Maternal 25(OH)D sufficiency was positively associated with fetal femur and humerus z-scores (P<0.01) even after adjustment for co-factors<br>Optimal calcium intake and adequate maternal vitamin D status are both needed to maximize fetal bone growth                                                                                                      |
| <i>Ioannou et al.</i> | prospective                          | 357             | UK          | 25(OH)D              | 34w                  | insufficiency <75 nmol/L<br>sufficiency >75 nmol/L                                    | maternal age, height, and smoking                                | 25(OH)D levels correlated with femoral volume (P=0.006; r=0.147) and proximal metaphyseal diameter (PMD) (P=0.001; r=0.176)<br><br>On multiple regression only the effect of 25(OH)D on PMD remained significant                                                                                                                                               |
| <i>Mahon et al.</i>   | prospective                          | 424             | UK          | 25(OH)D              | 34 w                 | sufficient/borderline >50 nmol/L<br>insufficient 25-50 nmol/L<br>deficient ≤25 nmol/L | -                                                                | Lower 25(OH)D was not related with FL but was associated with greater femoral metaphyseal cross-sectional area and a higher femoral splaying index at 19 weeks (r=-0.16, (95%CI:-0.25 to -0.06) and r=-0.17, (95%CI: -0.26 to -0.07), respectively and at 34 weeks gestation (r=-0.10, 95%CI:-0.20 to 0.00) and r=-0.11, (95%CI: -0.21 to -0.01), respectively |
| <i>Miliku et al.</i>  | population-based, prospective cohort | 7098            | Netherlands | 25(OH)D              | 2nd trim.            | quartile 1: 1.5–24.1 nmol/L<br>quartile 2: 24.2–46.6 nmol/L                           | -                                                                | Mothers who had 25(OH)D concentrations in the lowest quartile had an increased risk of SGA (OR: 2.07; 95% CI: 1.33, 3.22).                                                                                                                                                                                                                                     |

|                                |                   |                         |        |                                           |                |                                                               |                                                                           |                                                                                                                                                                                                                                                                                                                                                                                                                                                                                                                                                                                                                                                                                                                                                                                                                                                                                                                                      |
|--------------------------------|-------------------|-------------------------|--------|-------------------------------------------|----------------|---------------------------------------------------------------|---------------------------------------------------------------------------|--------------------------------------------------------------------------------------------------------------------------------------------------------------------------------------------------------------------------------------------------------------------------------------------------------------------------------------------------------------------------------------------------------------------------------------------------------------------------------------------------------------------------------------------------------------------------------------------------------------------------------------------------------------------------------------------------------------------------------------------------------------------------------------------------------------------------------------------------------------------------------------------------------------------------------------|
|                                |                   |                         |        |                                           |                | quartile 3: 46.7–73.7 nmol/L<br>quartile 4: 73.8–193.2 nmol/L |                                                                           | <p>Neonates born to mothers with 25(OH)D levels belonging to the two lowest quartiles had restricted head circumference from 2nd trim, onward [differences: 1st quartile -0.20 SDS (95% CI: 20.29, 20.12 SDS) and 2nd quartile -0.09 SDS (95% CI: 20.17, 20.01 SDS)]</p> <p>Low maternal 25(OH)D concentrations are also associated with an increased risk of preterm birth and small size for gestational age at birth.</p>                                                                                                                                                                                                                                                                                                                                                                                                                                                                                                         |
| <i>Galthen-Sørensen et al.</i> | Systematic review | 5 observational studies | -      | 25(OH)D                                   | -              | -                                                             | -                                                                         | low maternal 25(OH)D levels may affect fetal bone growth under certain circumstances, especially in cases of simultaneous low calcium intake                                                                                                                                                                                                                                                                                                                                                                                                                                                                                                                                                                                                                                                                                                                                                                                         |
| <i>Mastorakos et al.</i>       | prospective       | 100                     | Greece | Sclerostin, sRANKL, osteocalcin, 25(OH)D3 | All trimesters | -                                                             | gestational age, maternal BMI, maternal insulin concentrations, fetal sex | <p>2nd trim.: maternal sclerostin positively associated with abdominal circumference (r=0.361, P=0.03) and birthweight (r=0.632, P&lt;0.001), while maternal sRANKL with fetal abdominal subcutaneous fat thickness (r=0.357, P=0.034), sagittal abdominal diameter (r=0.502, P=0.004) and abdominal circumference (r=0.416, P=0.015)</p> <p>Maternal 25(OH)D3 correlated positively with fetal abdominal subcutaneous fat thickness (r=0.287, P=0.032) and neonatal abdominal circumference (r=0.344, P=0.407)</p> <p>3<sup>rd</sup> trim.: maternal sclerostin correlated positively with fetal abdominal diameter (r=0.763, P=0.019), while sRANKL with fetal abdominal circumference (r=0.328, P=0.044) and sagittal abdominal diameter (r=0.402, P=0.038)</p> <p>Maternal second trimester serum sclerostin levels were the best positive predictors of birth weight P=0.003, beta coeff. = 0.568, adj. R<sup>2</sup>=0.264</p> |

Table S1: Studies on the effect of maternal bone turnover biomarkers on intrauterine fetal growth. CRL: crown-rump length, FGR: fetal growth restriction, SGA: small for gestational age, EFW: estimated fetal weight, NT: nuchal translucency, AGA: appropriate for gestational age, LGA: large for gestational age, GDM: gestational diabetes mellitus
