# Supplementary material for: The Gestational Effects of Maternal Bone Marker Molecules on Fetal Growth, Metabolism and Long-Term Metabolic Health: A Systematic Review
Source: MDPI journal article supplement (doi:10.3390/ijms23158328), 2022-07-28
Supplement: s1 [file s1]

| Author                   | Type of study                  | N                                   | Ethnicity | Trimester                     | Adjusted covariates for                                              | Maternal Marker Studied  | Outcome                                                                                                                                                                                                                                              | Other outcomes/Comments                                                                                                                                                           |
|--------------------------|--------------------------------|-------------------------------------|-----------|-------------------------------|----------------------------------------------------------------------|--------------------------|------------------------------------------------------------------------------------------------------------------------------------------------------------------------------------------------------------------------------------------------------|-----------------------------------------------------------------------------------------------------------------------------------------------------------------------------------|
| <i>Briana et al.</i>     | Prospective                    | 80<br>30 IUGR<br>30 LGA<br>30 AGA   | Greece    | At labor                      | -                                                                    | sclerostin               | Maternal and fetal sclerostin concentrations did not differ among LGA, IUGR, and AGA groups                                                                                                                                                          | In LGA group, maternal concentrations were elevated in cases of GDM (b=11.861, 95% CI 0.517-23.205, p = 0.041)<br><br>Included gestational pathology cases in IUGR and LGA groups |
| <i>Mastorakos et al.</i> | Prospective                    | 100                                 | Greece    | 2nd and 3rd trim.             | 2 <sup>nd</sup> trim. insulin levels, gestational age, and fetal sex | sclerostin               | 2nd trim.: positive correlation between maternal sclerostin levels and neonatal birthweight (r=0.632, P<0.001)                                                                                                                                       | Maternal serum sclerostin during 2nd trim. was the best positive predictor of birthweight (Standardized Beta Coefficient=0.568, P=0.003, adjusted R <sup>2</sup> =0.264)          |
| <i>Godang et al.</i>     | prospective                    | 202                                 | Norway    | 30 – 32 w                     | -                                                                    | sclerostin               | No significant effects of maternal sclerostin on neonatal Bone Mineral Content were found                                                                                                                                                            | Other maternal bone metabolism biomarkers studied (a-klotho, fibroblast growth factor 23 and 25(OH)D), showed no significant correlations either                                  |
| <i>Wei et al.</i>        | Nested-case control study      | 230 with LBW neonates<br>3 controls | China     | All three trim.               | Maternal age and pre-pregnancy BMI                                   | osteocalcin              | mothers with elevated osteocalcin serum levels during the 1st and 2nd trim., had a 2.3- (adjusted ORs=2.29, 95% CI: 1.11–4.72, p=0.025) and 1.59 - times higher risk (ORs=1.59, 95%CI: 1.03–2.45, p=0.036) of a low birthweight neonate respectively | 3rd trim.: No significant associations were found                                                                                                                                 |
| <i>Briana et al.</i>     | prospective                    | 40<br>20 AGA<br>20 IUGR             | Greece    | At labor                      | -                                                                    | Osteoprotegerin & sRANKL | No significant differences in osteoprotegerin or sRANKL concentrations were observed between AGA and IUGR groups                                                                                                                                     |                                                                                                                                                                                   |
| <i>Essley et al.</i>     | prospective longitudinal study | 155<br>(adolescent pregnancies)     | USA       | Mid-gestation and at delivery |                                                                      |                          | osteoprotegerin concentrations in cord blood were correlated with maternal osteoprotegerin concentrations and                                                                                                                                        | no direct correlations between maternal osteoprotegerin levels and neonatal birthweight or ponderal index were reported                                                           |

|  |  |  |  |  |  |  |                                                                                                  |  |
|--|--|--|--|--|--|--|--------------------------------------------------------------------------------------------------|--|
|  |  |  |  |  |  |  | were negatively associated with infant birth weight z-score (P=0.02) and ponderal index (P=0.02) |  |
|--|--|--|--|--|--|--|--------------------------------------------------------------------------------------------------|--|

Table S3: Studies on the effects of maternal bone turnover markers during gestation on neonatal anthropometric indices. FGR: fetal growth restriction, IUGR: intrauterine growth restriction, SGA: small for gestational age, EFW: estimated fetal weight, AGA: appropriate for gestational age, LGA: large for gestational age, LBW: low birthweight
