# Supplementary material for: The Gestational Effects of Maternal Bone Marker Molecules on Fetal Growth, Metabolism and Long-Term Metabolic Health: A Systematic Review
Source: MDPI journal article supplement (doi:10.3390/ijms23158328), 2022-07-28
Supplement: s1 [file s1]

| Author               | Type of study | N    | Ethnicity            | Trimester       | Adjusted for covariates                                                                                                                                                                                                                                                             | Maternal Marker Studied | Cutoffs                                                                                                      | Outcome                                                                                                                                          | Other outcomes/Comments |
|----------------------|---------------|------|----------------------|-----------------|-------------------------------------------------------------------------------------------------------------------------------------------------------------------------------------------------------------------------------------------------------------------------------------|-------------------------|--------------------------------------------------------------------------------------------------------------|--------------------------------------------------------------------------------------------------------------------------------------------------|-------------------------|
| <b>Casey et al.</b>  | prospective   | 1150 | Northern Ireland, UK | 28 w            | season of sampling, maternal age at OGTT, maternal BMI at OGTT, smoker during pregnancy, alcohol use during pregnancy, family history of diabetes, gestational age at delivery, gender of neonate, parity, systolic blood pressure at OGTT, maternal height, and maternal education | 25(OH)D                 | 25(OH)D quintiles: $\leq 25$ nmol/L, 25.01–49.99nmol/L, 50–74.99nmol/L, 75–99.99nmol/L and $\geq 100$ nmol/L | no significant associations between maternal 25(OH)D levels and cord blood glucose levels, HOMA-IR and HOMA- $\beta$ at delivery                 |                         |
| <b>Godang et al.</b> | prospective   | 202  | Norway               | 14-16 & 30-32 w | Maternal BMI                                                                                                                                                                                                                                                                        | 25(OH)D                 | -                                                                                                            | no significant associations between maternal 25(OH)D and umbilical cord plasma C-peptide levels<br>maternal BMI ( $\beta = -0.02$ , $P = 0.84$ ) |                         |

Table S4: Studies on the effects of maternal bone turnover markers during gestation on fetal metabolism. OGTT: oral glucose tolerance test, HOMA-IR: homeostatic model assessment for insulin resistance
