# Supplementary material for: The Gestational Effects of Maternal Bone Marker Molecules on Fetal Growth, Metabolism and Long-Term Metabolic Health: A Systematic Review
Source: Int J Mol Sci. 2022 Jul 28;23(15):8328. doi: 10.3390/ijms23158328 (PMC9368754; doi:10.3390/ijms23158328)
Supplement: Supplementary file 1 [file ijms-23-08328-s001.zip]

Archive with 5 entries (5 files):
- Table S1_Ultrasound Indices.pdf
- Table S2_VitD_Birth Anthropometrics.pdf
- Table S3_Biomarkers_Birth anthropometrics.pdf
- Table S4_Fetal Metabolism.pdf
- Table S5_Future Health.pdf
